# Supplementary material for: Quantitative determination of acetylsalicylic acid and acetaminophen in tablets by FT-Raman spectroscopyElectronic Supplementary Information available. See http://www.rsc.org/suppdata/an/b1/b108240j/
Source: Royal Society of Chemistry journal article supplement (doi:10.1039/b108240j), 2001-12-10
Supplement: fig.doc [file fig.doc]

Fig. S1 Concentration vs. concentration plots for ASA/CaCO3/starch/citric acid system
